# Supplementary material for: Red blood cell phase separation in symmetric and asymmetric microchannel networks: effect of capillary dilation and inflow velocity
Source: PubMed Central journal article supplement (PMC5114676; doi:10.1038/srep36763), 2016-11-18
Supplement: srep36763-s1.pdf [file srep36763-s1.pdf]

# Red blood cell phase separation in symmetric and asymmetric microchannel networks: effect of capillary dilation and inflow velocity

Francesco Clavica<sup>1</sup>, Alexandra Homsy<sup>2</sup>, Laure Jeandupeux<sup>2</sup>, Dominik Obrist<sup>1</sup>

<sup>1</sup>ARTORG Center, University of Bern, Bern, Switzerland

<sup>2</sup>Haute Ecole Arc Ingénierie, HES-SO University of Applied Sciences Western Switzerland, La Chaux-de-Fonds, Switzerland

## Supplementary information

**Table S1:** detailed parameters used for the PTVlab algorithm.

| <b>PTV settings</b>                                         | <b>Particle detection</b>           |
|-------------------------------------------------------------|-------------------------------------|
| PTV algorithm = Cross correlation/<br>Interrogation window. | Detection algorithm = Gaussian mask |
| Interrogation area = 20 pixels                              | Correlation Threshold = 0.5         |
| Minimum correlation = 0.4                                   | Sigma = 10 pixels (particle size)   |
| Similarity neighbours = 25 %                                | Intensity threshold = 200           |

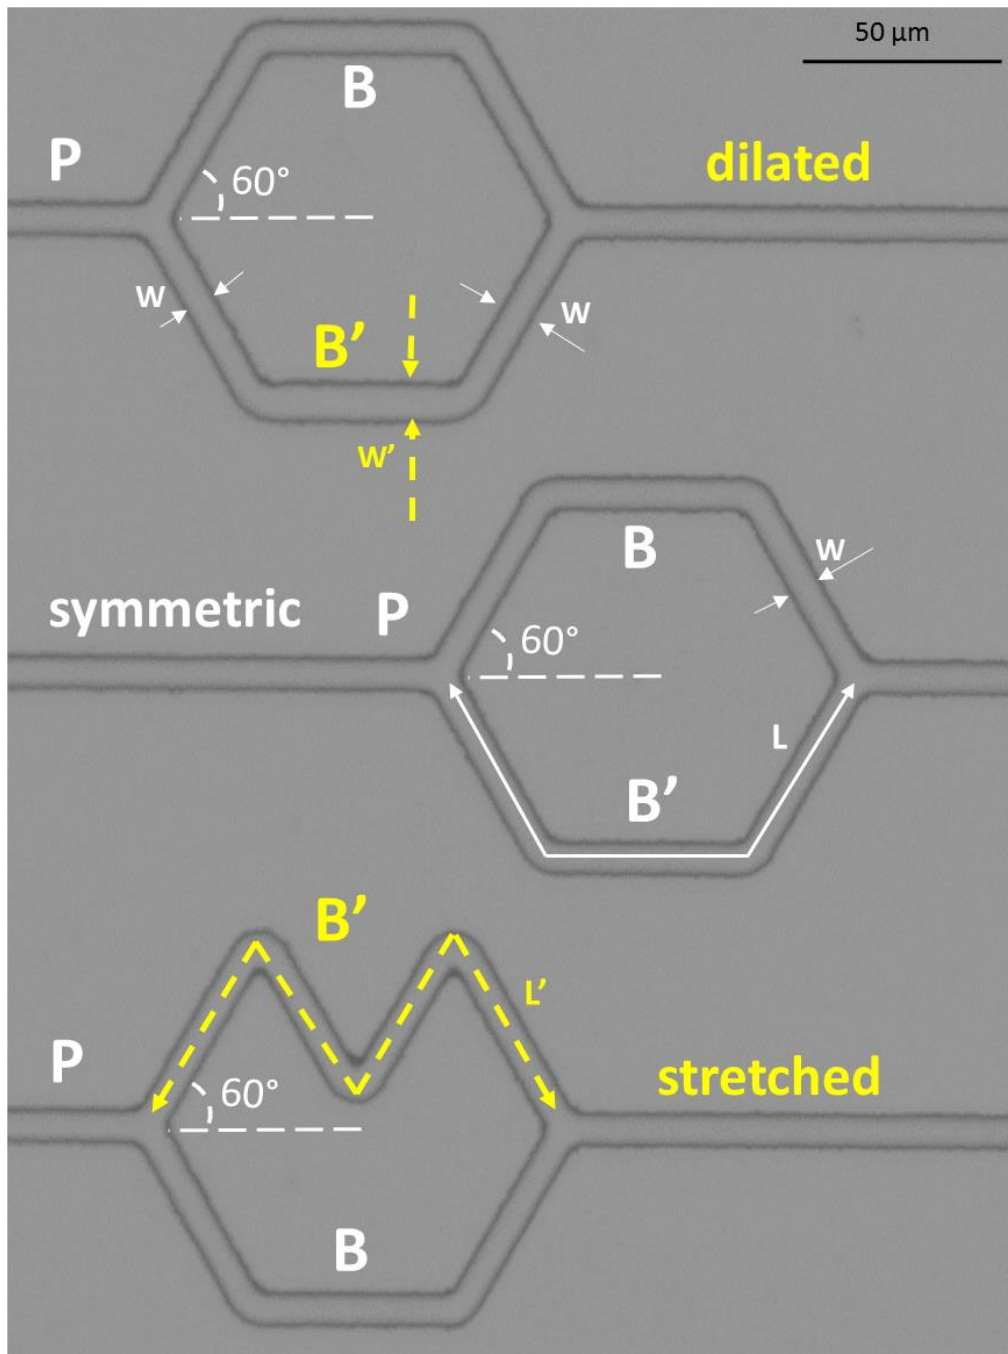

**Figure S1. Experimental setup (hexagonal networks).** Microscope image (10x magnification) of hexagonal networks: three different networks were included in the same microdevice, P denotes the parent vessel, B and B' the daughter branches (the bifurcation angle was  $60^\circ$ ). B indicates daughter branches characterized by a total length  $L = 211.38 \pm 0.9 \mu\text{m}$  and width  $W = 10.2 \pm 0.3 \mu\text{m}$  ( $N=5$ ). i) Symmetric model (middle) has identical daughter branches B and B' ii) Dilated model (inset, upper) has one daughter branch B and one modified branch B' which has same length as B but different width  $W' = 12.16 \pm 0.1 \mu\text{m} > W$  (in the the horizontal segment) iii) Stretched model (inset, lower) has one daughter branch B and one modified branch B' with the same width as B but with different total length  $L' = 259.32 \pm 3.1 \mu\text{m} > L$  (dashed arrows). All models had a common inlet and separate outlets. The average channel height was  $H = 8.1 \pm 0.4 \mu\text{m}$  in all channels. The parent vessel (P) in all the models had a length of  $200 \mu\text{m}$  and same width as B branch.

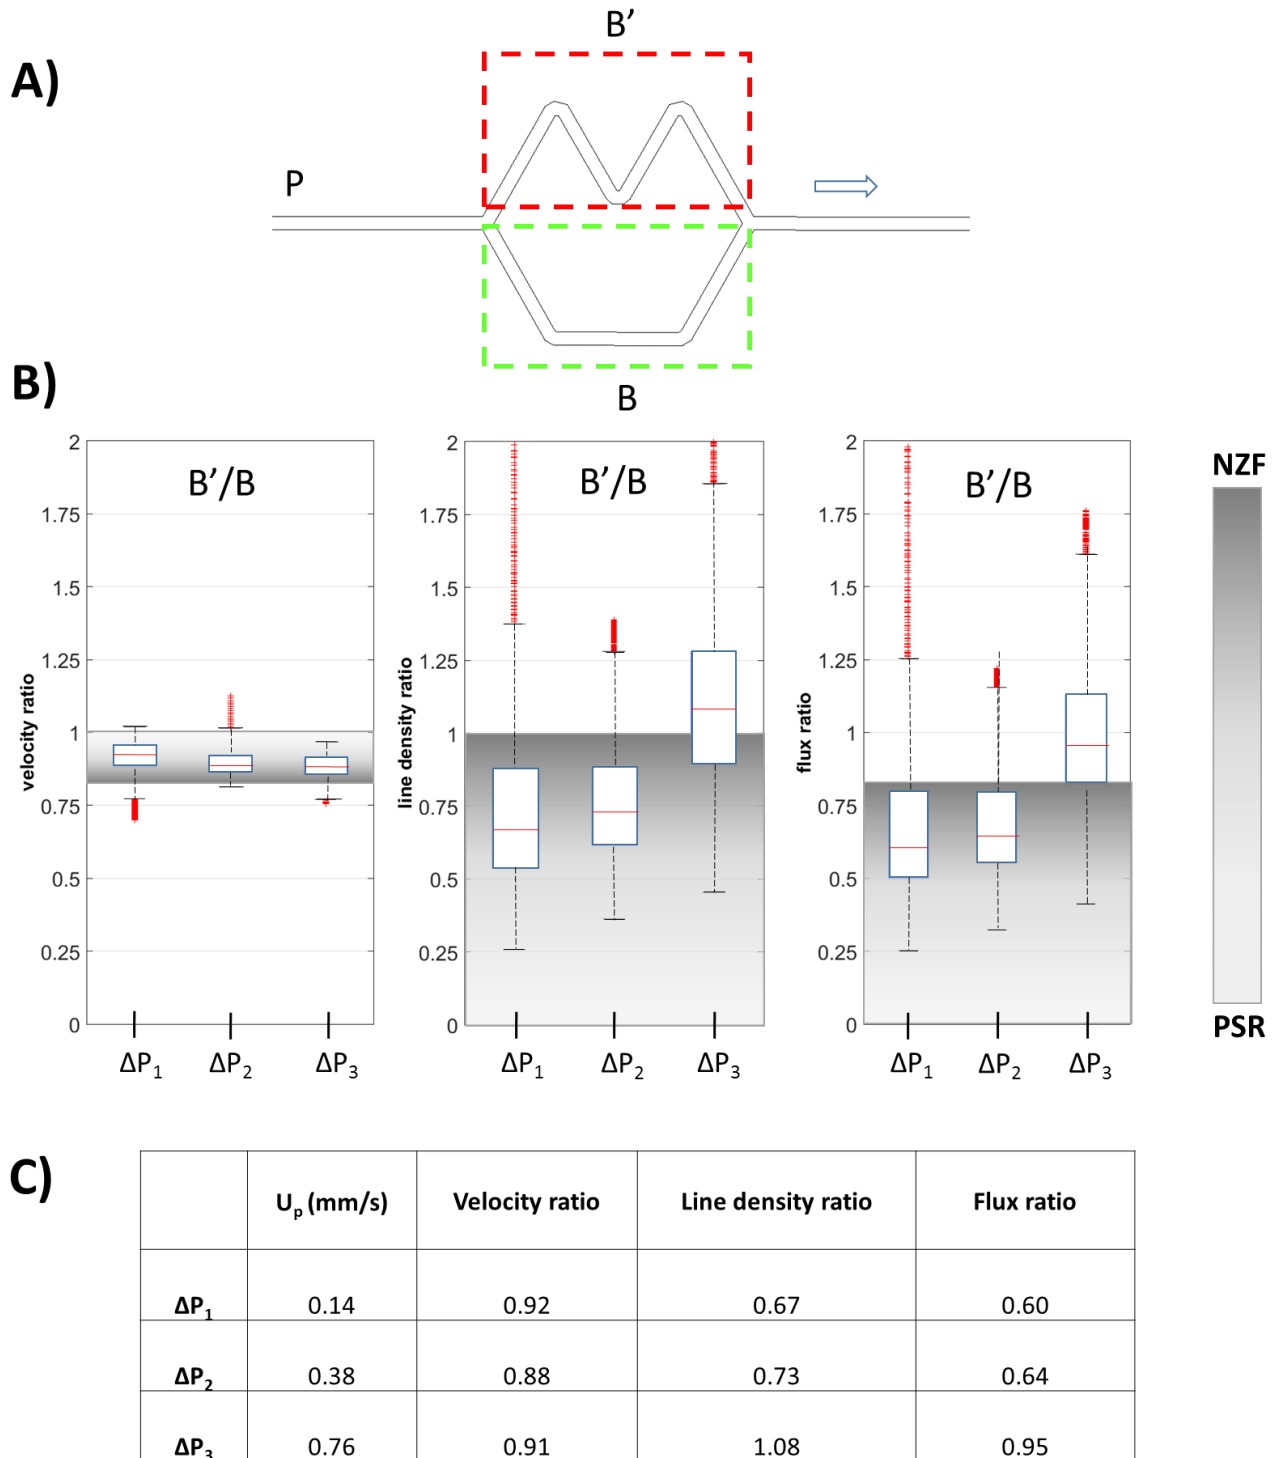

**Fig. S2 Effects of inflow rate on phase separation in stretched model (hexagonal).** A) Schematic of the stretched model (hexagonal) with the branch B' longer (ROI: red dashed rectangle) than the B branch (ROI: green dashed rectangle). The arrow indicates the direction of flow. In this experiment three perfusion pressures were used:  $\Delta P_1=2\text{cmH}_2\text{O}$ ,  $\Delta P_2=5\text{cmH}_2\text{O}$ ,  $\Delta P_3=10\text{cmH}_2\text{O}$ . C) Boxplots of the ratios of RBC velocity, line density and flux of branches B' and B for different perfusion pressures  $\Delta P_i$ . The shaded areas indicate the range between the no-Zweifach-Fung condition (dark grey, NZF) and perfectly self-regulated situation (light gray, PSR). C) Table of median values of the ratios shown in panel B as function of  $\Delta P$ . Up indicates the average velocity estimated for the parent vessel.

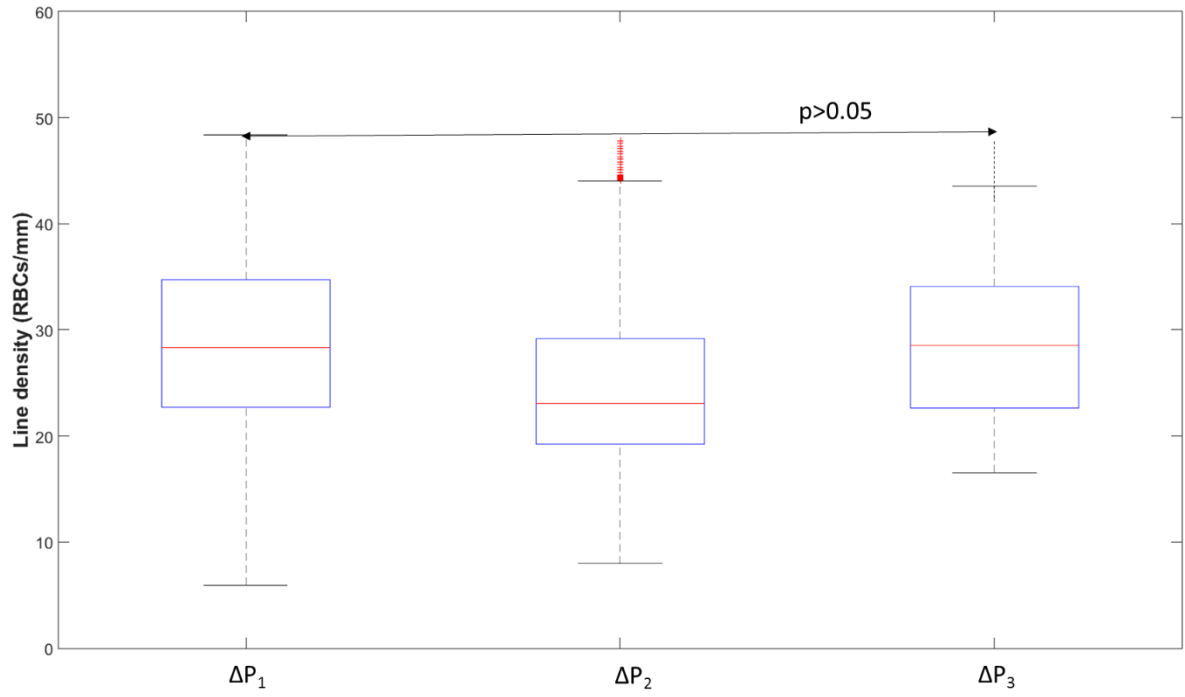

**Fig. S3** Line density vs perfusion pressure in the parent vessel of the stretched mode (T-junction)
